# Supplementary material for: Removal of toxic Microcystis aeruginosa using discharge plasma: mechanism and potential environmental risks
Source: Royal Society of Chemistry journal article supplement (doi:10.1039/d3ew00334e), 2023-01-01
Supplement: d3ew00334e1.pdf [file d3ew00334e1.pdf]

## Supporting Information

### Removal of toxic *Microcystis aeruginosa* using discharge plasma: mechanism and potential environmental risks

Yanshun Gan<sup>a</sup>, Pengcheng Yan<sup>a</sup>, Zhengfei Zhu<sup>a</sup>, Rong Zhang<sup>a</sup>,  
Guangzhou Qu<sup>a,b,\*</sup>, Tiecheng Wang<sup>a,b</sup>, Ronghua Li<sup>a,b</sup>, Zengqiang Zhang<sup>a,b</sup>

<sup>a</sup>College of Natural Resources and Environment, Northwest A&F  
University, Yangling, Shaanxi Province 712100, PR China

<sup>b</sup>Key Laboratory of Plant Nutrition and the Agri-environment in  
Northwest China, Ministry of Agriculture, Yangling, Shaanxi, 712100,  
PR China

\*Corresponding author: Guangzhou Qu

E-mail: [qugz@nwsuaf.edu.cn](mailto:qugz@nwsuaf.edu.cn)

**2 Texts**

**2 Tables**

**7 Figures**



### **Text S1.** Chlorination experiments and analytical methods of DBPs

After the discharge plasma treatment, DOM samples with different treatment times were chlorinated with NaClO according to the DOC concentration (CDOC: CCl<sub>2</sub>=1:3) [1], with the addition of 0.8 mL of phosphate buffer solution (pH=7.0). After 6 d of chlorination reaction in the dark, L-ascorbic acid was immediately added into the mixtures to prevent the residual chlorine reaction. Afterwards, each sample of 20 mL solution was used for DBP extraction and analysis. For THMs, HANs, HKs, HALs, and HNMs extraction, 4 mL methyl tert-butyl ether (MTBE) containing 8.0 g anhydrous sodium sulfate was added to the samples, and they were put under vortex movement for 2 min to complete the extraction. After 30 min of settling, 1 mL solution from the organic phase was drawn out and analyzed on an Agilent 6890 GC equipped with a DB-5 column (J&WScientific 30 m × 0.25 mm × 0.001 mm), and an electron capture detector (ECD). The GC temperature program: initial temperature at 35°C for 9 min, rise to 40 °C at 2 °C/min and hold for 1 min, rise to 80 °C at 20°C/min, rise to 160°C at 40°C/min and hold for 4 min. 2 μL injection volumes were used in splitless mode. The carrier and make-up gases were ultra-high purity (UHP) hydrogen and UHP nitrogen, respectively. The total run time was 30 min. The injector and detector temperatures were set at 230 and 260 °C, respectively. The minimum reporting limit for DBP measurements was 0.5 μg·L<sup>-1</sup>.

For HAAs extraction, 20 mL of HA samples was mixed with 1.0 mL  $\text{H}_2\text{SO}_4$  and 8.0 g anhydrous sodium sulfate uniformly, and shaken by vortex until  $\text{Na}_2\text{SO}_4$  was dissolved completely. 4 mL of MTBE was then added to the solution and put under vortex movement for 2 min to extract entirely. After 30 min of settling, 2 mL supernatant was drawn out and thoroughly mixed with 2 mL acidified methanol (10%  $\text{H}_2\text{SO}_4$ ) in a glass bottle, and heated in water bath at 50 °C for 2 h to complete the derivatization of HAAs. 5 mL  $\text{Na}_2\text{SO}_4$  ( $150 \text{ g}\cdot\text{L}^{-1}$ ) was added to the above cooled sample, and the solution was settled until stratified absolutely. The next step was to remove lower layer solution. 1 mL saturated  $\text{NaHCO}_3$  solution was added into the glass bottle, and the solution was shaken vigorously to release the  $\text{CO}_2$ . After 5 min of settling, 1 mL solution from the MTBE phase was drawn out, and analyzed on an Agilent 7890 GC [2]. The GC temperature program: initial temperature at 40 °C for 10 min, rise to 65 °C at 2.5 °C/min, rise to 85 °C at 10 °C/min, rise to 205 °C at 20 °C/min and hold for 5 min. 2  $\mu\text{L}$  injection volumes was used in splitless mode. The carrier and make-up gases were ultra-high purity (UHP) hydrogen and UHP nitrogen, respectively. The total run time was 24.5 min. The injector and detector temperatures were set at 200 and 300 °C, respectively. The minimum reporting limit for each HAA species measurements was  $0.5 \mu\text{g}\cdot\text{L}^{-1}$ .

## **Text S2. Cytotoxicity test**

The CHO-k1 cell line purchased from the American Type Culture Collection was used to perform the toxicity assay. The culture medium DMEM/F12 (1:1) was added with streptomycin ( $0.1 \text{ mg}\cdot\text{mL}^{-1}$ ), penicillin G ( $100 \text{ unit}\cdot\text{mL}^{-1}$ ), and fetal bovine serum (10%). Cells culture dishes were placed in an incubator with saturated humidity and 5%  $\text{CO}_2$  gas at  $37 \text{ }^\circ\text{C}$ . Cells undergoing 2-5 passages were used for the toxicity assay. Cell passaging was conducted every 48 h.

To perform cytotoxicity assay,  $1\times 10^4$  cells per well was seeded in a sterile 96S5 well plate (3599, Corning, USA), and cultured for 12 h before the cells were exposed to organic byproducts. The dried organic extracts were firstly dissolved in 1mL DMEM/F12 containing 0.5% DMSO (V:V). Then 100  $\mu\text{L}$  of cell cultures were exposed to 100  $\mu\text{L}$  of the solution for 72 h. DMEM/F12 containing 0.5% DMSO was used as the negative control, while phenol dissolved in DMEM/F12 containing 0.5% DMSO was used as the reference compound. All the 96-well plates for toxicity assay were covered with the sterilized seal films to avoid the cross contamination. After 72 h exposure, the culture medium was discarded. Cells were washed with 100  $\mu\text{L}$  phosphate buffered solution (PBS). Then 100  $\mu\text{L}$  of the reagent in Cell Counting Kit-8 (CCK-8) dissolved in DMEM/F12 was added into each well of the 96-well plates. Cells were then cultured in the incubator ( $37^\circ\text{C}$ ) for another 2 h, then the

absorbance of each well at 450 nm was measured using the microplate reader SpectraMax i3 (Molecular Devices, USA). Each test was performed in 6-12 replicates.

The cell viability (CV) for a sample or reference compound was calculated according to the following formula [3]:

$$CV = (A_S - A_B) / (A_N - A_N)$$

where CV is the cell viability for a sample or phenol against the negative control. The  $A_S$  is the absorbance of the sample or phenol at 450 nm.  $A_B$  is the absorbance of the blank control (only added the Cell Counting Kit-8 reagent dissolved in DMEM/F12) at 450 nm. The  $A_N$  is the absorbance of the negative control at 450 nm.

**Table S1.** Molecular weight and LC<sub>50</sub> values of different DBPs in this study

| DBPs                                 | MW (g mol <sup>-1</sup> ) | LC <sub>50</sub> (M) | Reference |
|--------------------------------------|---------------------------|----------------------|-----------|
| Trichloromethane (TCM)               | 119.38                    | 9.62E-03             | [4]       |
| Trichloroacetic acid (TCAA)          | 163.38                    | 2.40E-03             | [5]       |
| Dichloroacetic acid (DCAA)           | 128.94                    | 7.30E-03             | [4]       |
| 1,1,1-Trichloropropanone (1,1,1-TCP) | 147.42                    | NA                   | NA        |
| 1,1-Dichloro-2-Propanone (1,1-DCP)   | 126.96                    | NA                   | NA        |
| Chloral hydrate (CH)                 | 165.40                    | 1.16E-03             | [6]       |
| Dichloroacetonitrile (DCAN)          | 109.94                    | 5.73E-05             | [6]       |
| Trichloroacetonitrile (TCAN)         | 144.38                    | 1.60E-04             | [4]       |
| Trichloronitromethane (TCNM)         | 164.38                    | 5.36E-04             | [7]       |

**Table S2.** UV-Vis characteristic value of DOM with different treatment times

| Treatment time (min) | E2/E3 | E3/E4 | SUVA <sub>254</sub> |
|----------------------|-------|-------|---------------------|
| 0                    | 6.15  | 4.06  | 0.28                |
| 1                    | 5.96  | 6.77  | 0.62                |
| 2                    | 6.88  | 6.28  | 0.69                |
| 3                    | 8.58  | 7.48  | 0.63                |
| 5                    | 10.86 | 10.39 | 0.53                |
| 10                   | 12.19 | 9.52  | 0.36                |
| 15                   | 14.58 | 9.78  | 0.38                |
| 20                   | 16.74 | 12.24 | 0.35                |
| 30                   | 23.14 | 13.29 | 0.44                |
| 40                   | 28.41 | 13.81 | 0.51                |

E2/E3:  $UVA_{250}/UVA_{365}$ ; E3/E4:  $UVA_{300}/UVA_{400}$ ; SUVA<sub>254</sub>:  $UV_{254} \times 100 / DOC$ ,  $L \cdot (mg \cdot m)^{-1}$ .



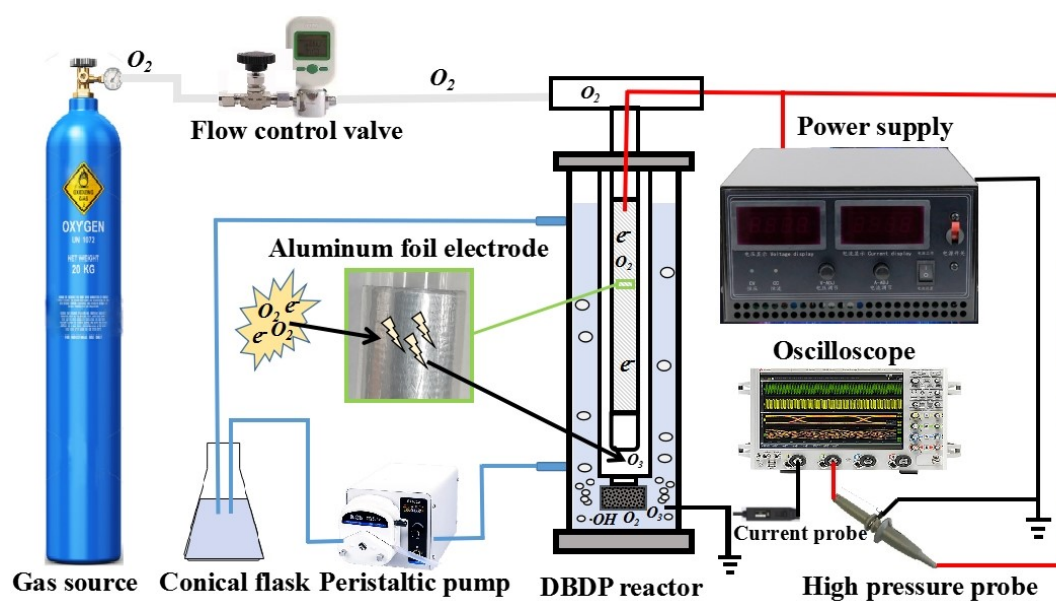

**Fig. S1.** Experimental system

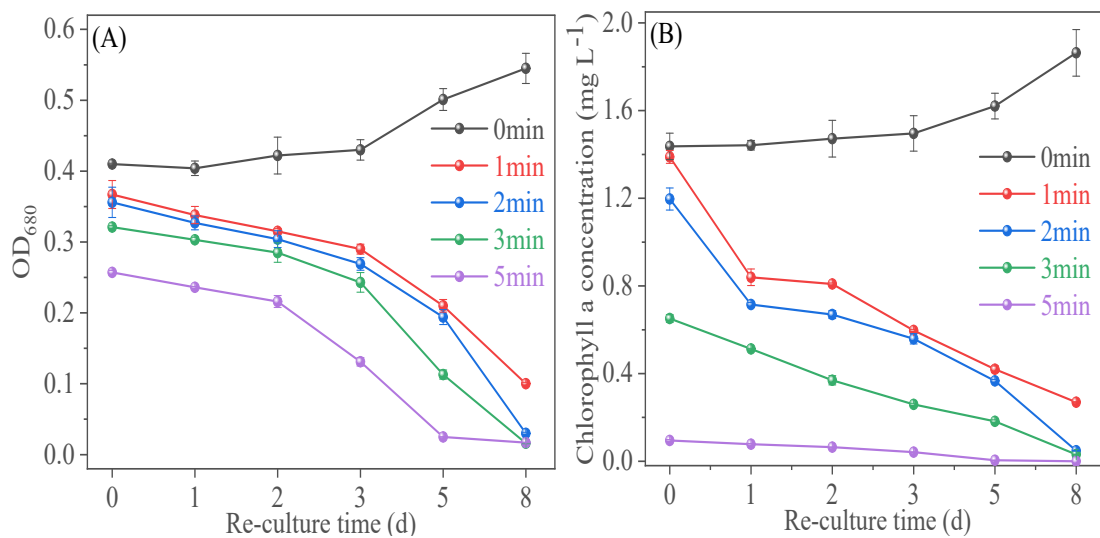

**Fig. S2.** The chlorophyll a and OD<sub>680</sub> of re-cultured *M. aeruginosa* cells after discharge plasma treatment

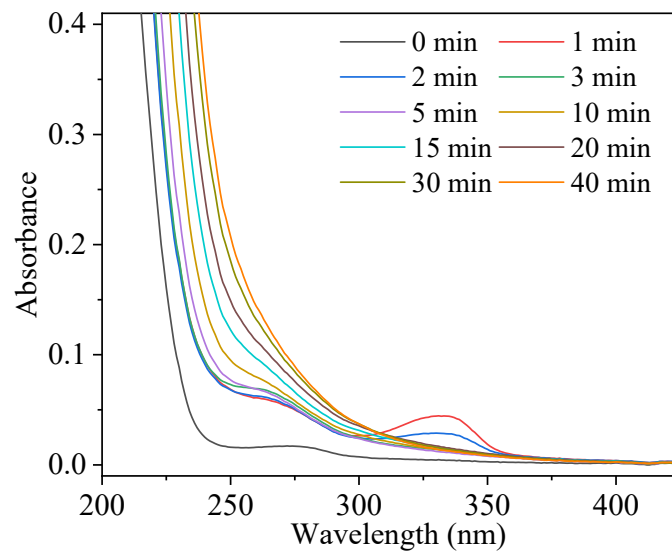

**Fig. S3.** UV-Vis spectra of DOM with different treatment times

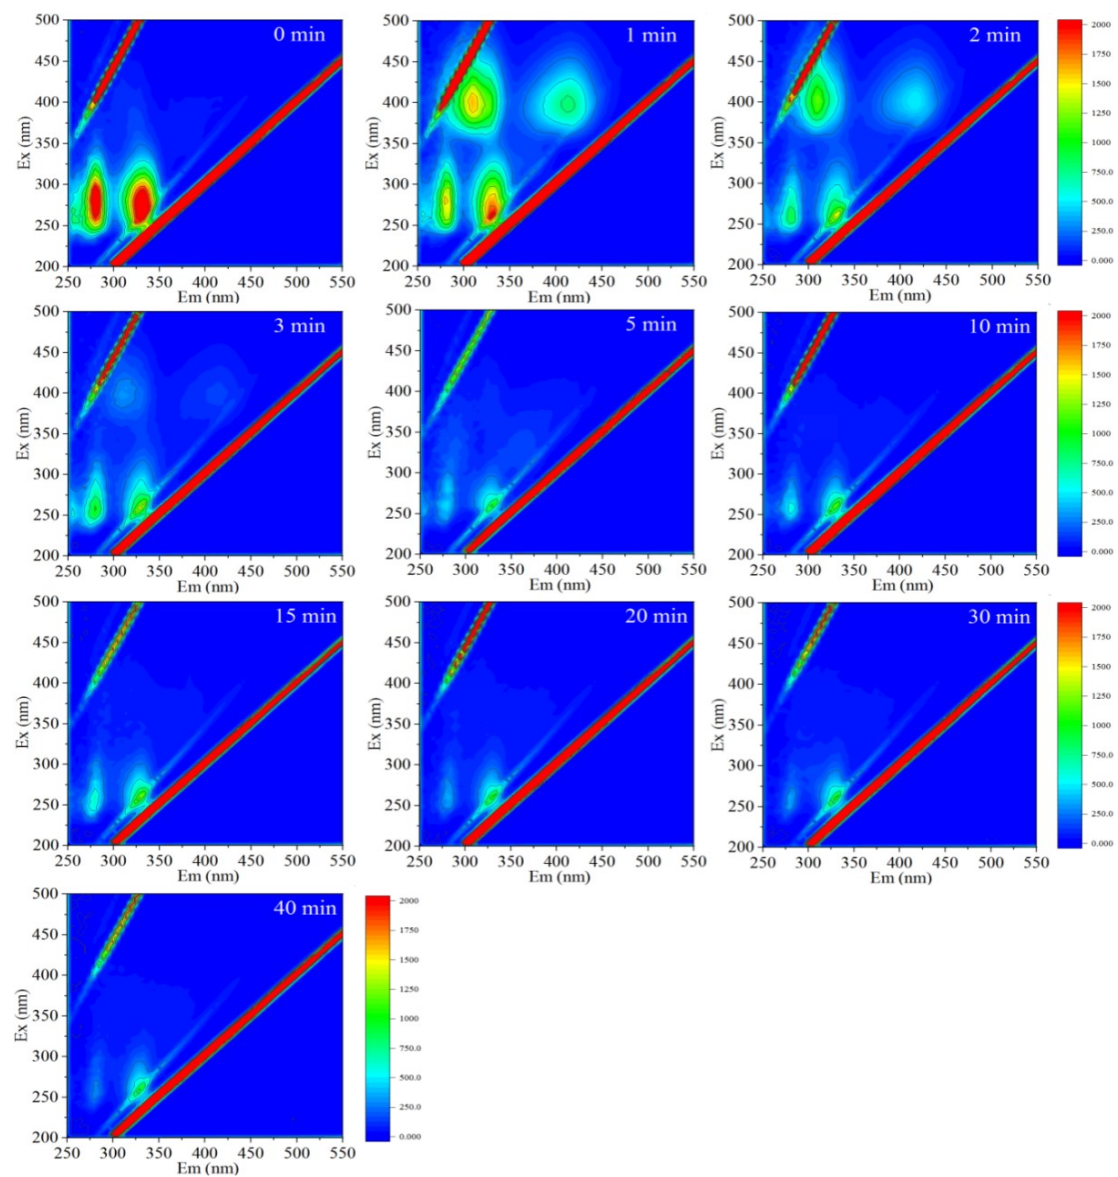

**Fig. S4.** EEM contour maps of DOM during discharge plasma treatment process

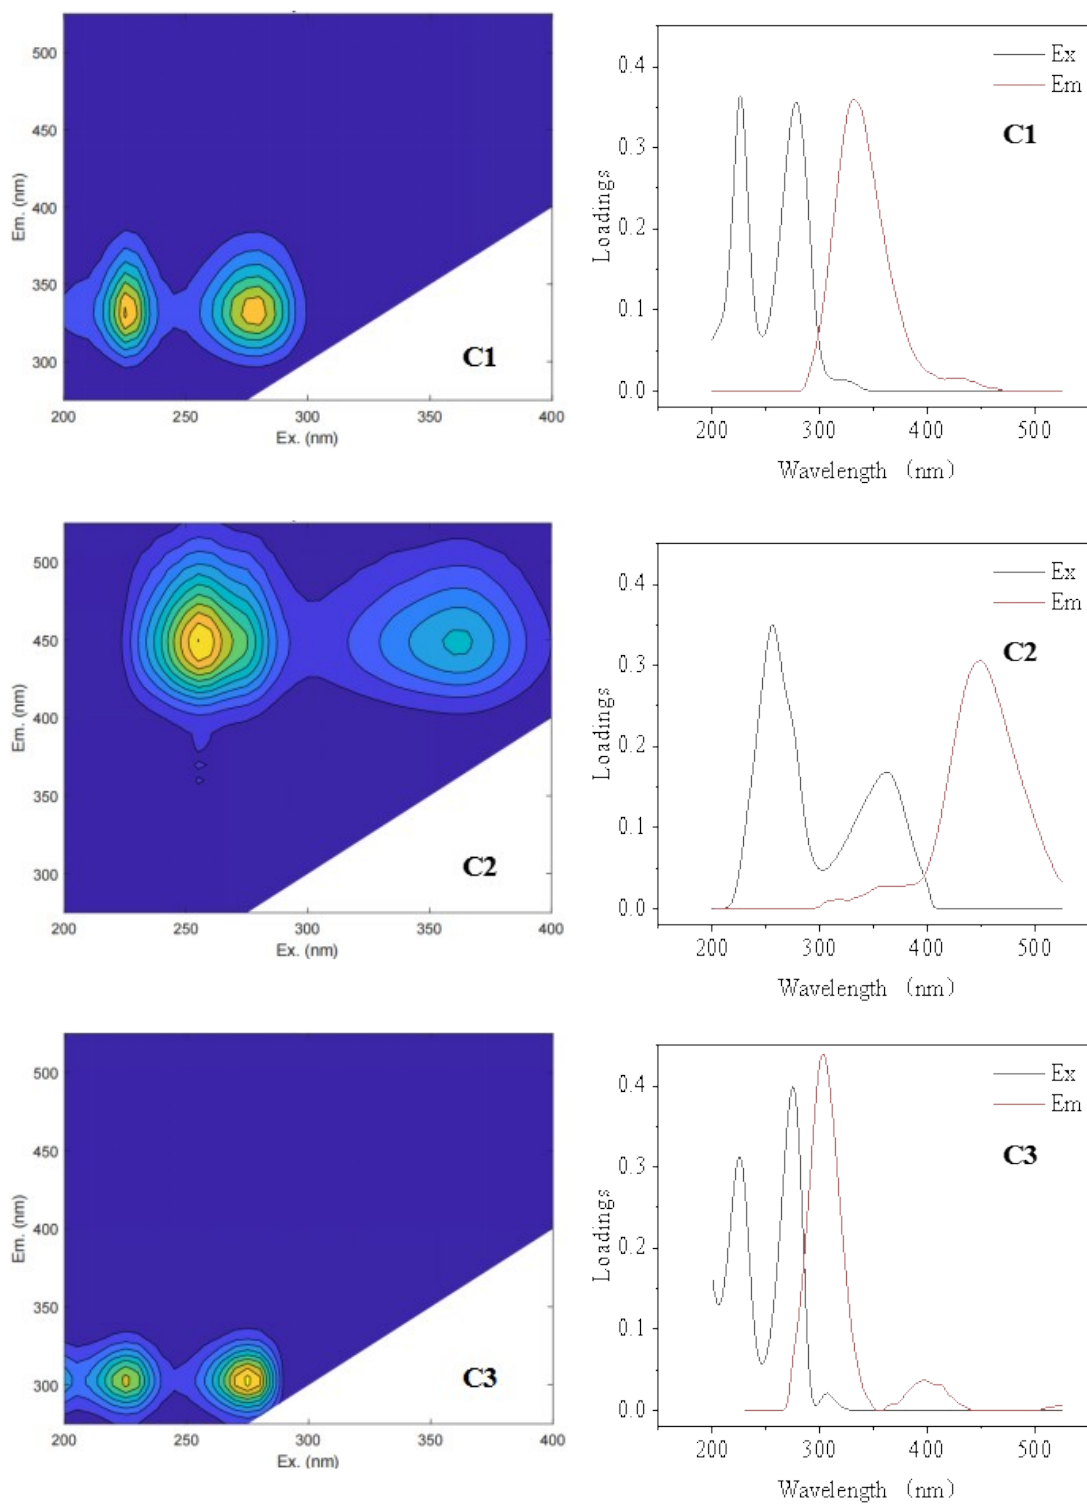

**Fig. S5.** Three PARAFAC components (C1, C2 and C3) and their corresponding wavelength loadings identified by EEM-PARAFAC analysis

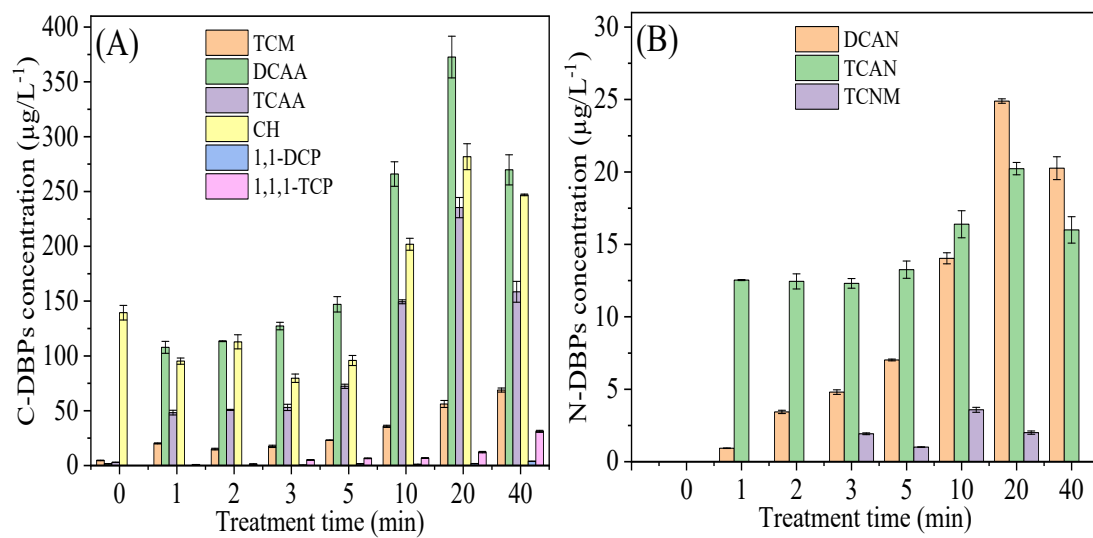

**Fig. S6.** Concentrations of DBPs: (A) concentrations of C-DBPs, (B) concentrations of N-DBPs

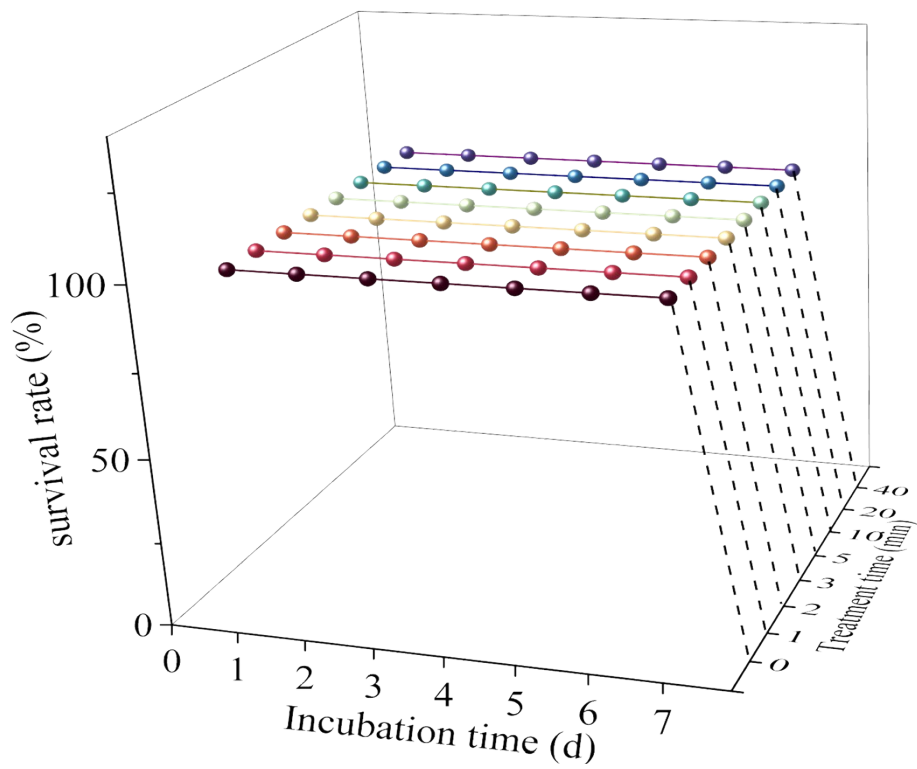

**Fig. S7.** The survival rate of zebrafish cultured in DOM sample solution with different plasma treatment time for 7 days

## References

1. Q. Hu, R.G. Wang, Y.S. Gan, Y. Zhang, H.Z. Bao, L.B. Zhang, G.Z. Qu, T.C. Wang, Chlorinated disinfection by-product formation during DOM removal by discharge plasma: Insights into DOC structure alterations, *Sep Purif Technol.*, 2022, 294 ,121183.
2. R.G. Wang, T.C. Wang, G.Z. Qu, Y. Zhang, X.T. Guo, H.Z. Jia, L.Y. Zhu, Insights into the underlying mechanisms for integrated inactivation of *A. spiroides* and depression of disinfection byproducts by plasma oxidation, *Water Res.*, 2021, 196 , 117027.
3. Q.Y. Wu, L.L. Yang, X.Y. Zhang, W.L. Wang, Y. Lu, Y. Du, Y. Lu, H.Y. Hu, Ammonia-mediated bromate inhibition during ozonation promotes the toxicity due to organic byproduct transformation. *Environ Sci Technol.*, 2020, 54 , 8926-8937.
4. M.J. Plewa, Y. Kargalioglu, D. Vanker, R.A. Minear, E.D. Wagner, Mammalian cell cytotoxicity and genotoxicity analysis of drinking water disinfection by-products, *Environ Mol Mutagen.*, 2002, 40 , 134-142.
5. M.J. Plewa, J.E. Simmons, S.D. Richardson, E.D. Wagner, Mammalian cell cytotoxicity and genotoxicity of the haloacetic acids, a major class of drinking water disinfection by-products, *Environ Mol Mutagen.*, 2010, 51, 871-878.



6. C.H. Jeong, C. Postigo, S.D. Richardson, J.E. Simmons, S.Y. Kimura, B.J. Marinas, D. Barcelo, P. Liang, E.D. Wagner, M.J. Plewa, Occurrence and comparative toxicity of haloacetaldehyde disinfection byproducts in drinking water, *Environ Sci Technol.*, 2015, 49 , 13749-13759.
7. M.J. Plewa, E.D. Wagner, P. Jazwierska, S.D. Richardson, P.H. Chen, A.B. McKague, Halonitromethane drinking water disinfection byproducts: Chemical characterization and mammalian cell cytotoxicity and genotoxicity, *Environ Sci Technol.*, 2004, 38 , 62-68.
